# Supplementary material
Source: PubMed Central journal article supplement (PMC7253019)
Supplement: jciinsight-5-136073-s216.pdf [file jciinsight-5-136073-s216.pdf]

## Supplementary Tables

**Supplementary Table 1. Colorectal cancer patient pathological info.**

| Patient # | Gender | Age | Prior Treatments  | Pathology Status | Histologic Type     | T/N/M      | Stage |
|-----------|--------|-----|-------------------|------------------|---------------------|------------|-------|
| 1         | M      | 88  | None              | Cancer Primary   | Adenocarcinoma, NOS | T1, N0, MX | I     |
| 2         | F      | 76  | None              | Cancer Primary   | Adenocarcinoma, NOS | T2, N0, MX | I     |
| 3         | F      | 61  | Chemo (FOLFOX)    | Cancer Met       | Adenocarcinoma, NOS | T4,N1,M1   | IV    |
| 4         | F      | 46  | Combination (NOS) | Cancer Met       | Adenocarcinoma, NOS | T3,N1,M1   | IV    |
| 5         | M      | 50  | None              | Cancer Primary   | Adenocarcinoma, NOS | T4,N2a,MX  | IIIC  |
| 6         | M      | 63  | None              | Cancer Primary   | Adenocarcinoma, NOS | T1,N0,MX   | I     |
| 7         | M      | 64  | None              | Cancer Primary   | Adenocarcinoma, NOS | T3,N2b,MX  | IV    |
| 8         | M      | 34  | None              | Cancer Primary   | Adenocarcinoma, NOS | T3,N2b,Mx  | IV    |

**Supplementary Table 2. CyTOF antibody panel**

|    | Marker      | Clone       | Tag   | Cat      | 1Sample (µl) |
|----|-------------|-------------|-------|----------|--------------|
| 1  | CD45        | 30- F11     | 89Y   | 3089005B | 0.25         |
| 2  | I-A/I-E     | M5/114.15.2 | 209Bi | 3209006B | 0.5          |
| 3  | CD274/PD-L1 | 10F.9G2     | 153Eu | 3153016B | 0.25         |
| 4  | CD3e        | 145-2C11    | 152Sm | 3152004B | 0.25         |
| 5  | CD8a        | 53-6.7      | 146Nd | 3146003B | 0.5          |
| 6  | CD25        | 3C7         | 150Nd | 3150002B | 0.25         |
| 7  | CD127/IL7Ra | A7R34       | 175Lu | 3175006B | 0.5          |
| 8  | CD62L       | MEL-14      | 160Gd | 3160008B | 0.17         |
| 9  | CD69        | H1.2F3      | 145Nd | 3145005B | 0.5          |
| 10 | TCRb        | H57-597     | 143Nd | 3143010B | 0.5          |
| 11 | CD44        | IM7         | 171Yb | 3171003B | 0.2          |
| 12 | CD11b       | M1/70       | 148Nd | 3148003B | 0.17         |
| 13 | CD11c       | N418        | 142Nd | 3142003B | 0.5          |
| 14 | F4/80       | BM8         | 159Tb | 3159009B | 0.25         |
| 15 | Ly-6C       | HK1.4       | 162Dy | 3162014B | 0.2          |
| 16 | Ly-6G       | 1A8         | 141Pr | 3141008B | 0.5          |
| 17 | NK1.1       | PK136       | 170Er | 3170002B | 0.5          |
| 18 | CD45R/ B220 | RA3-6B2     | 176Yb | 3176002B | 0.5          |
| 19 | CD19        | 6D5         | 149Sm | 3149002B | 0.5          |
| 20 | TER-119     | TER-119     | 154Sm | 3154005B | 0.25         |
| 21 | EpCAM       | G8.8        | 166Er | 3166014B | 0.25         |
| 22 | Vimentin    | RV202       | 156Gd | 315602A  | 0.25         |
| 23 | CCR7        | 4B12        | 164Dy | 3164013A | 0.25         |
| 24 | LAG3        | C9B7W       | 174Yb | 3174019B | 0.25         |
| 25 | CD4         | RM4-5       | 172Yb | 3172003B | 0.5          |
| 26 | ST2         | DJ8         | Biot  | 101001B  | 0.5          |
|    | Anti-biot   | 1D4-C5      | 165Ho | 3165012B | 1            |
| 27 | CD206       | C068C2      | 169Tm | 3169021B | 0.25         |
